# Supplementary material
Source: MDPI journal article supplement (https://www.mdpi.com/2673-6209/3/3/36)
Supplement: s1 [file s1 › macromol-2529144-supplementary.pdf]

# **Molecular dynamics calculations for the temperature response of poly(alkylated tri(ethylene oxide)isocyanate) aqueous solution**

**Shunsuke Mizutani <sup>1</sup>, Shunya Kita <sup>1</sup>, Naoya Sakai <sup>1</sup>, Takuya Yamamoto <sup>1,2</sup>, Andrej Koleżyński <sup>3</sup>, Toyoji Kakuchi <sup>4</sup>, Shin-ichiro Sato <sup>1,2,\*</sup>**

<sup>1</sup> Graduate School of Chemical Sciences and Engineering, Hokkaido University, Sapporo, Hokkaido 060-8628, Japan

<sup>2</sup> Division of Applied Chemistry, Faculty of Engineering, Hokkaido University, Sapporo, Hokkaido 060-8628, Japan

<sup>3</sup> Faculty of Materials Science and Ceramics, AGH University of Science and Technology, 30 Mickiewicza Av., 30-059 Krakow, Poland

<sup>4</sup> Research Center for Polymer Materials, School of Materials Science and Engineering, Changchun University of Science and Technology (CUST), 130022 Changchun, China

\* Correspondence: s-sato@eng.hokudai.ac.jp; Tel.: (+81)11-706-6607

---

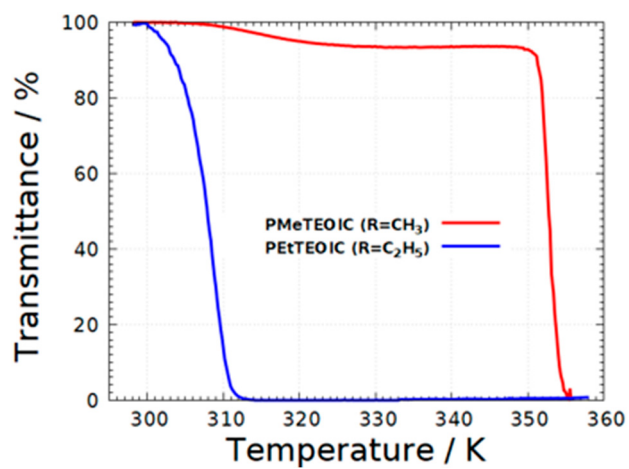

**Figure S1.** Transmittance versus temperature plots of 40 g L<sup>-1</sup> aqueous PMeTEOIC and PEtTEOIC solutions. The data were recorded at 400 nm at the heating rate of 1 K, reproduced from Reference [30] in the main text.

**Table S1.** Water numbers, molecular weight of polymers, and the concentrations of polymers.

| polymer                 | $N_w$ <sup>1</sup> | $M_w$ <sup>2</sup> | g/L  |
|-------------------------|--------------------|--------------------|------|
| (PMeTEOIC) <sub>2</sub> | 6791               | 3854               | 63.1 |
| (PEtTEOIC) <sub>2</sub> | 7739               | 4134               | 59.3 |

<sup>1</sup> The number of water molecules. <sup>2</sup> The molecular weight of polymers.

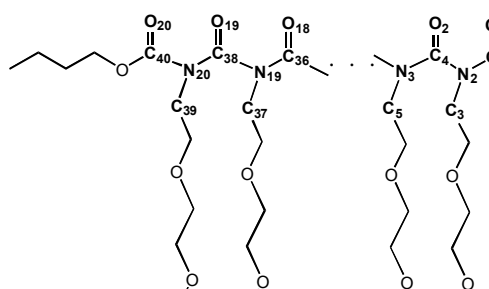

**Figure S2.** The chemical structure of PRTEOIC with the numbering of atoms which compose the dihedral angles in the polymer main chain.

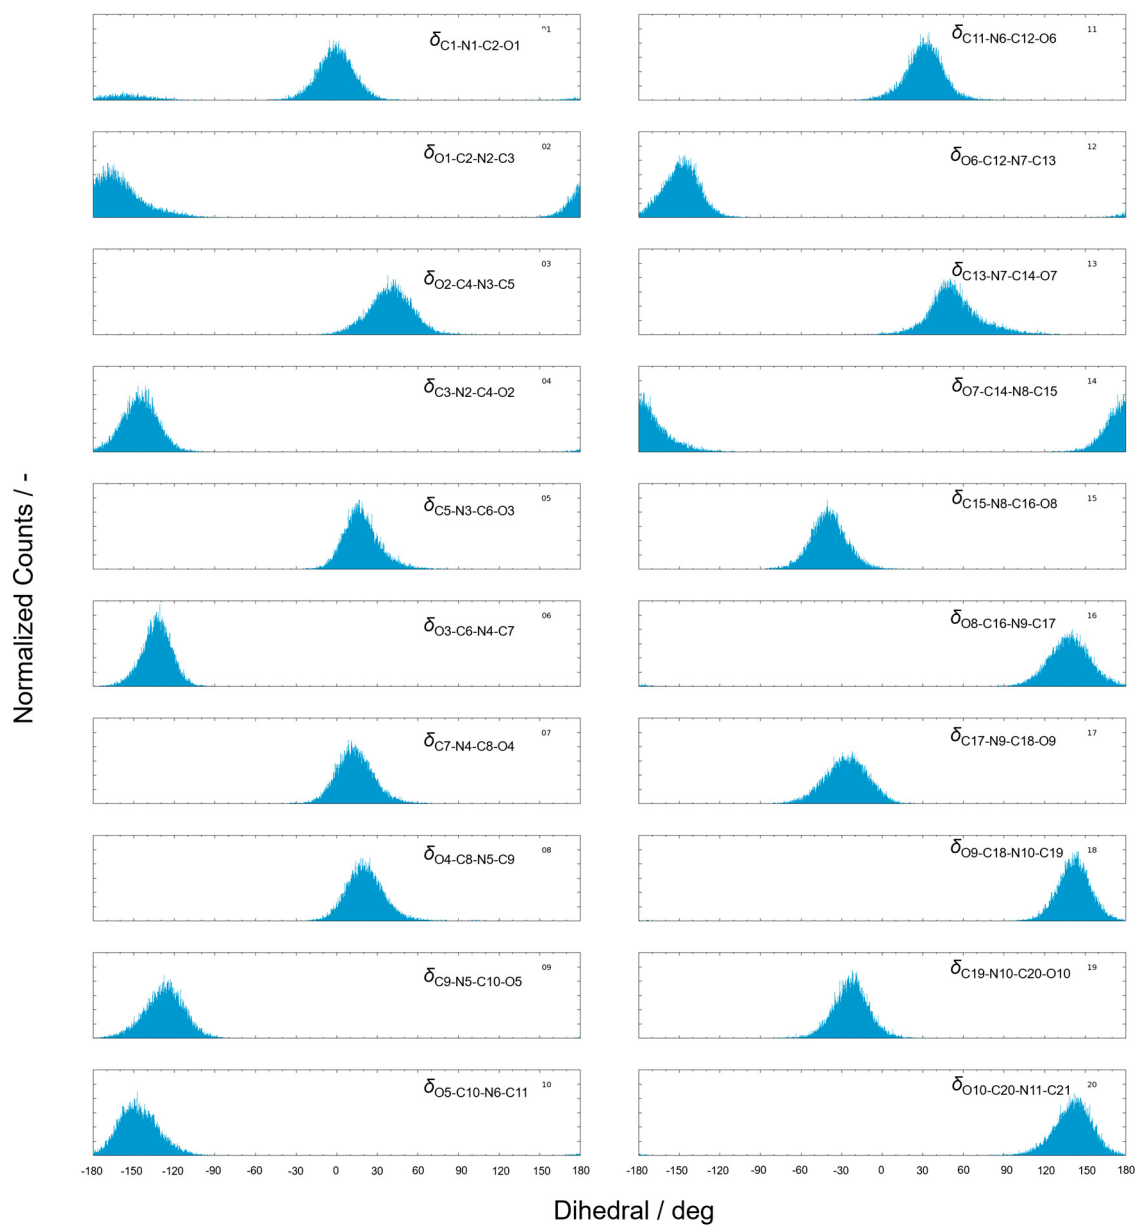

**Figure S3.** Distributions of dihedral angles ( $\delta_{C1-N1-C2-O1}$ – $\delta_{O10-C20-N11-C21}$ ) in the main chain of PMeTEOIC at 363 K.

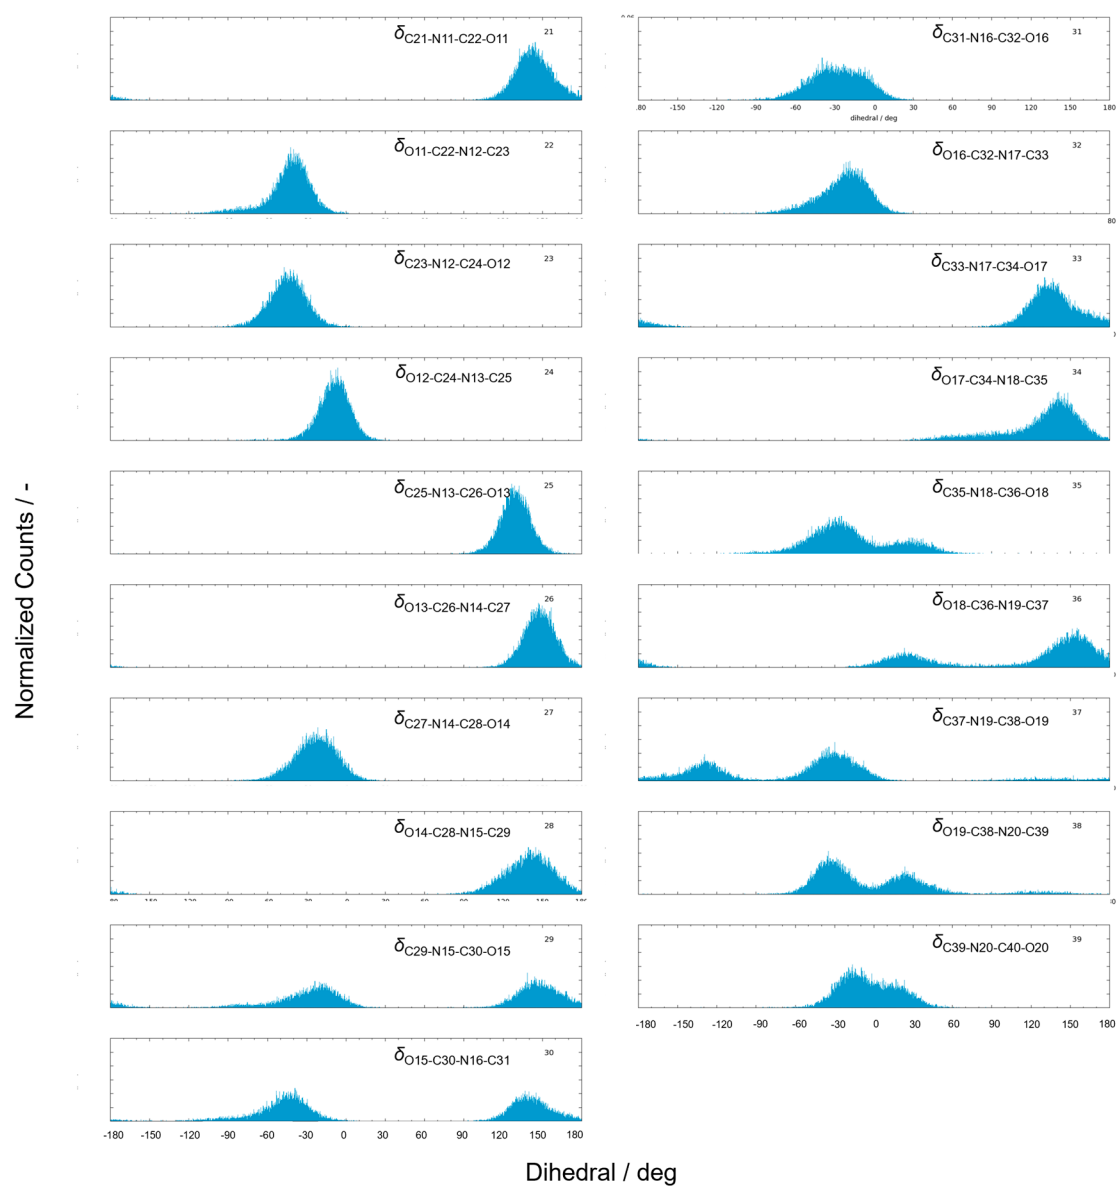

**Figure S4.** Distributions of dihedral angles ( $\delta_{C21-N11-C22-O11}$ – $\delta_{C39-N20-C40-O20}$ ) in the main chain of PMeTEOIC at 363 K.

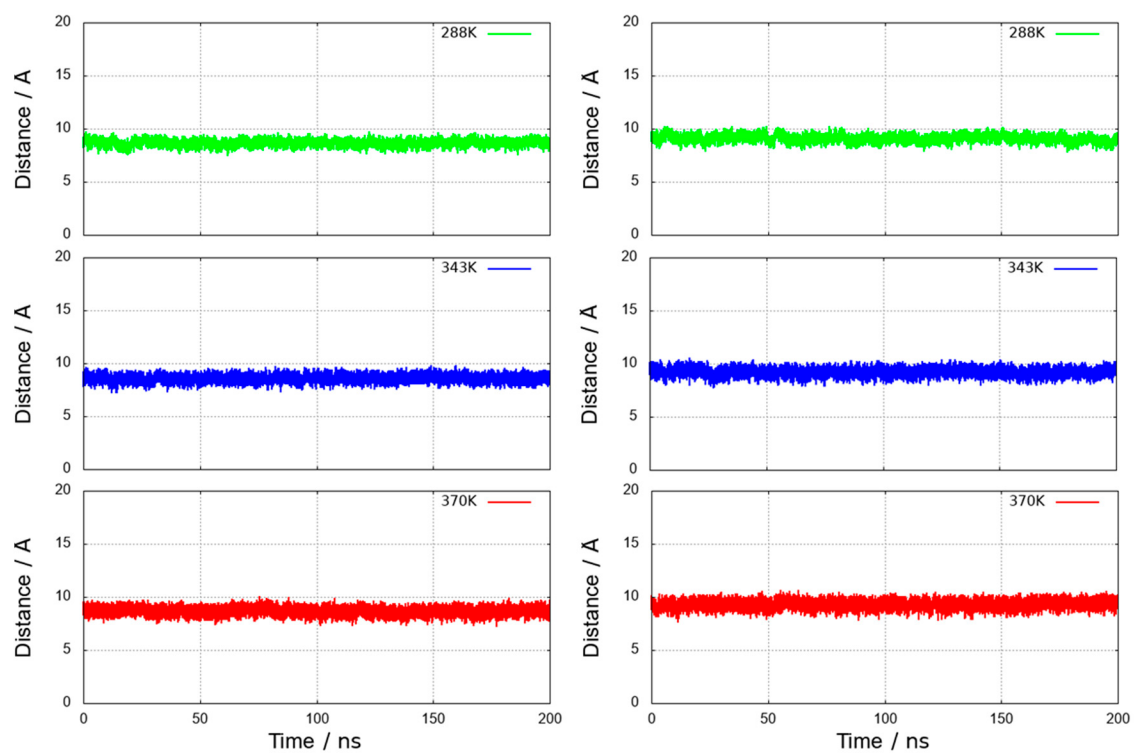

**Figure S5.** The side chain end-to-end distances for PMeTEOIC (left) and PEtTEOIC (right) at 288 K, 343 K and 370 K for 200 ns.

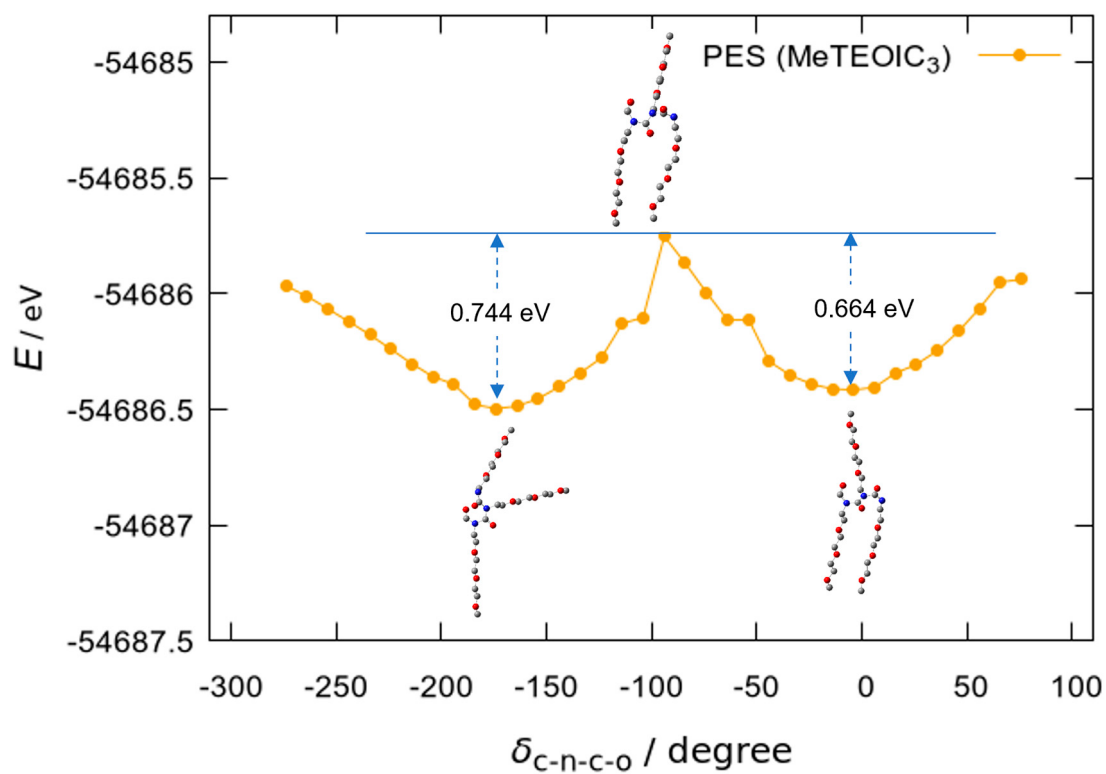

**Figure S6.** Potential Energy Surface (PES) along with the rotation of MeTEOIC<sub>3</sub> main chain was shown. Horizontal axis is the dihedral angle ( $\delta_{C-N-C-O}$ ) which consists of four atoms in trimer backbone. The calculations were conducted at B3LYP/6-31G(d) level.

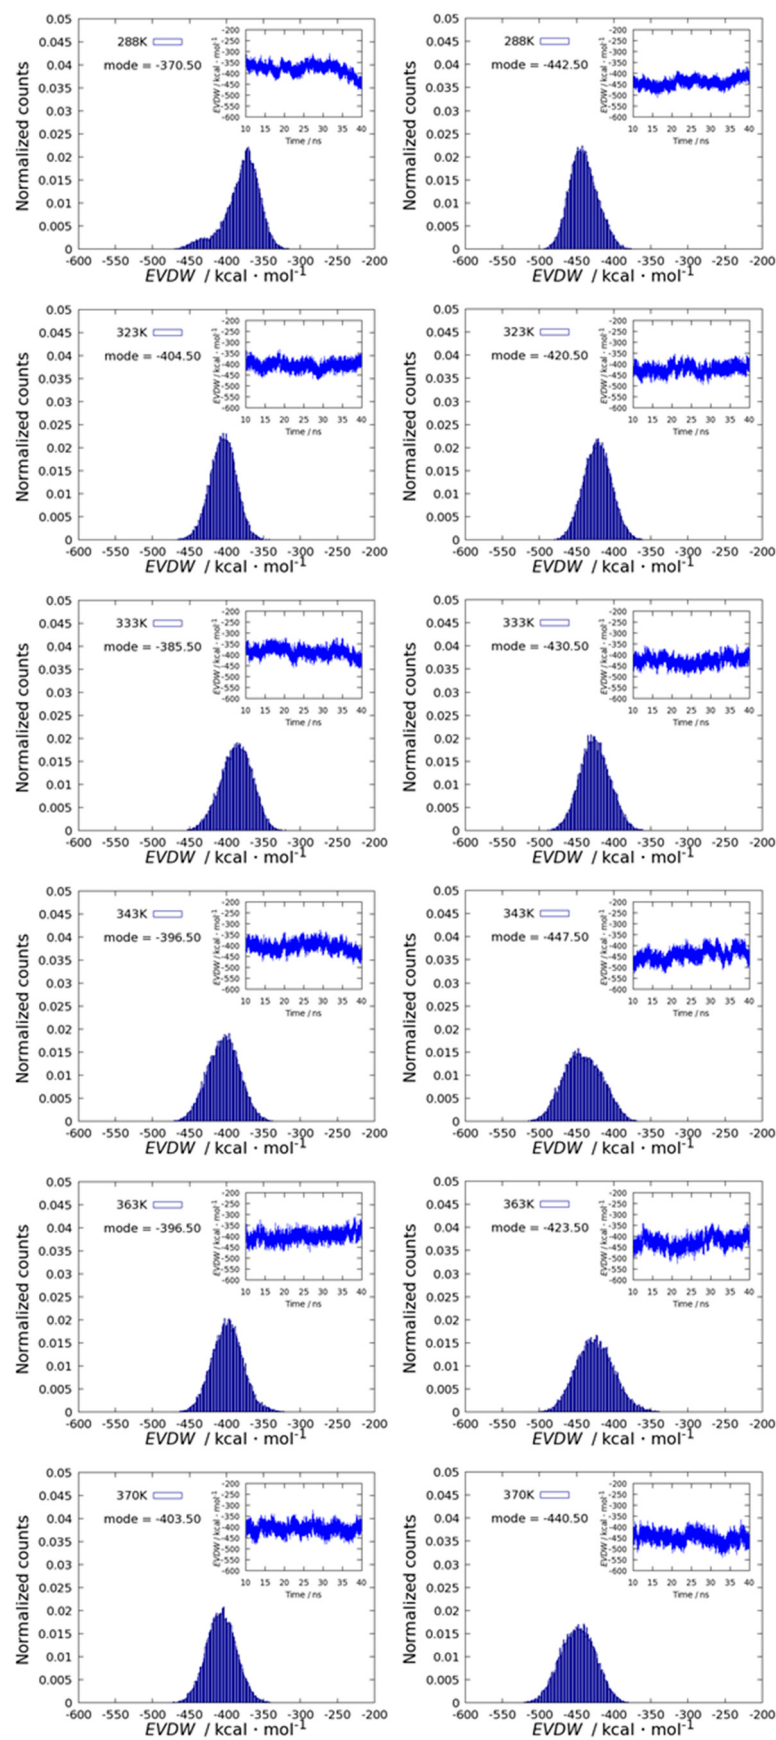

**Figure S7.** Distributions of Van der Waals energy (EVDW) for (PMeTEOIC)<sub>2</sub> (left) and (PEtTEOIC)<sub>2</sub> (Right) at six temperatures from 288 K to 370 K.

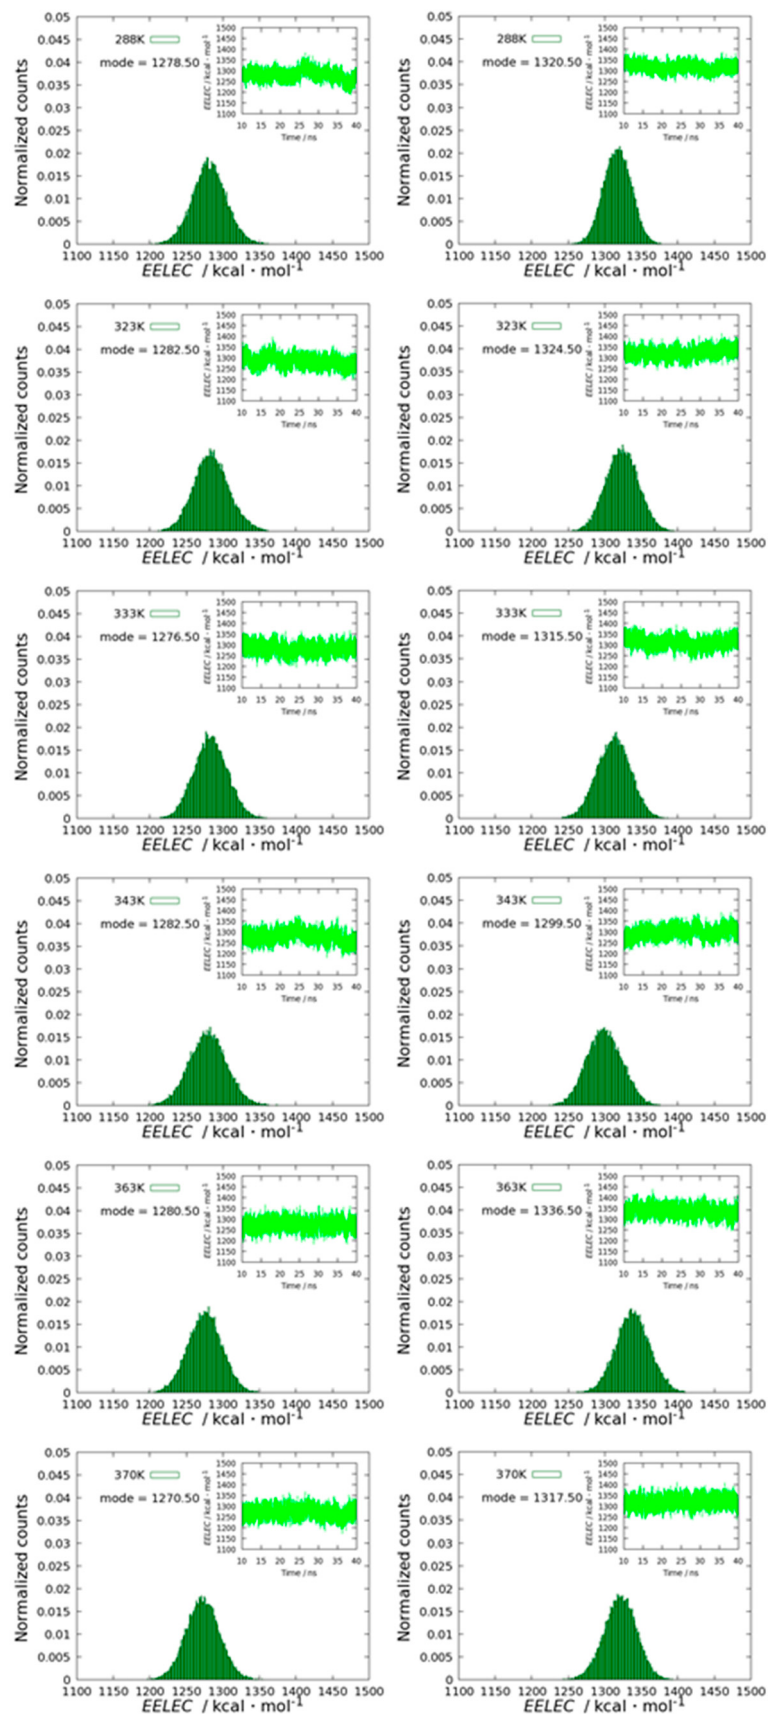

**Figure S8.** Distributions of electrostatic energy ( $EELEC$ ) for  $(PMeTEOIC)_2$  (left) and  $(PEtTEOIC)_2$  (Right) at six temperatures from 288 K to 370 K.

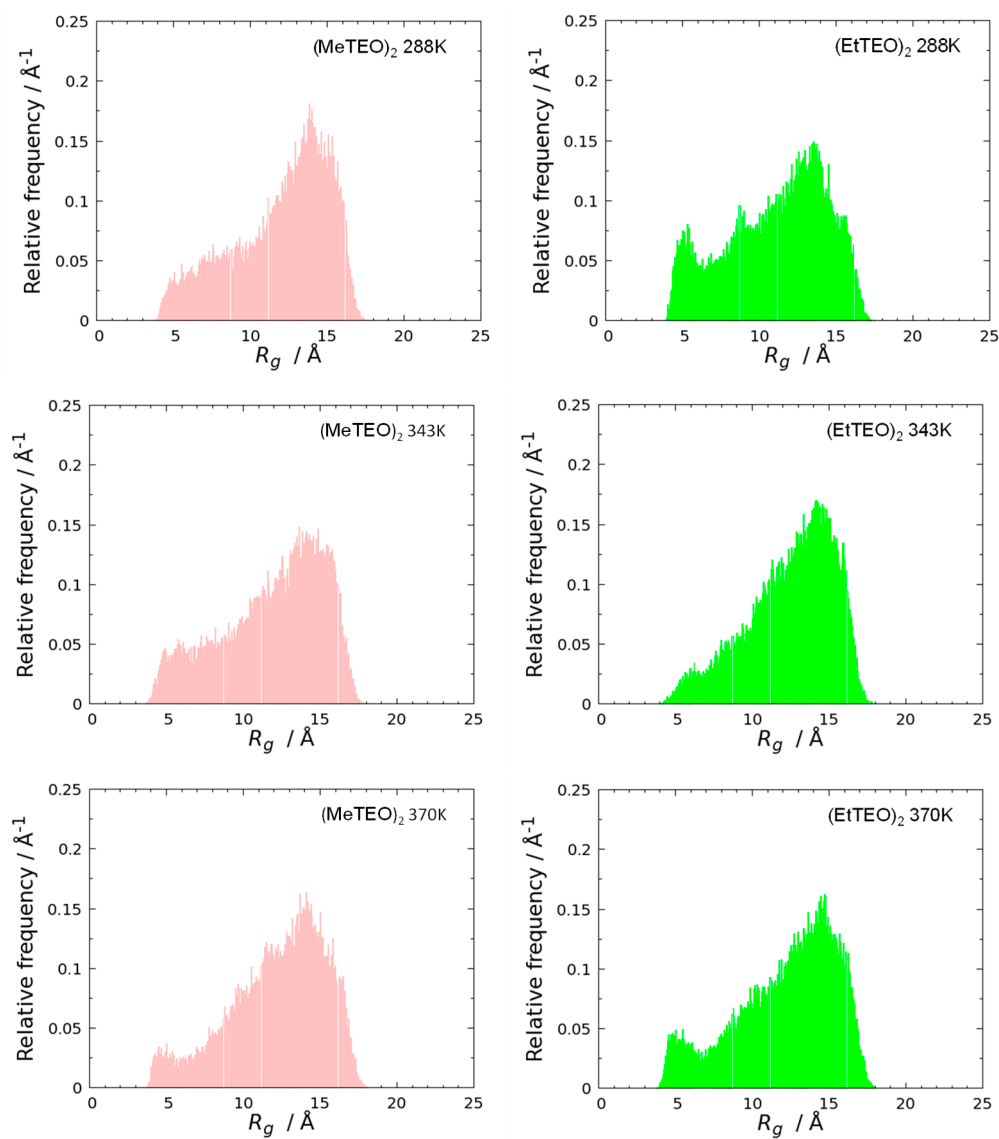

**Figure S9.**  $R_g$  distributions of  $(\text{MeTEO})_2$  (left) and  $(\text{EtTEO})_2$  (right) in water at 288, 343, and 370K.

**Table S2.** Electrostatic energy for (PRTEOIC)<sub>2</sub> at six temperatures.

| polymer chains          | $E_{elec}$ [kcal/mol] |       |       |       |       |       | $\mu^1$ | $\sigma^2$ |
|-------------------------|-----------------------|-------|-------|-------|-------|-------|---------|------------|
|                         | 283 K                 | 323 K | 333 K | 343 K | 363 K | 370 K |         |            |
| (PMeTEOIC) <sub>2</sub> | 1280                  | 1280  | 1280  | 1280  | 1280  | 1270  | 1280    | 4          |
| (PEtTEOIC) <sub>2</sub> | 1320                  | 1320  | 1320  | 1300  | 1340  | 1320  | 1320    | 12         |

<sup>1</sup> Value of  $E_{elec}$  averaged over six temperatures. <sup>2</sup> Standard deviation of  $E_{elec}$  at six temperatures.

**Table S3.** Van der Waals energy for (PRTEOIC)<sub>2</sub> at six temperatures.

| polymer chains          | $E_{vdW}$ [kcal/mol] |       |       |       |       |       | $\mu^1$ | $\sigma^2$ |
|-------------------------|----------------------|-------|-------|-------|-------|-------|---------|------------|
|                         | 283 K                | 323 K | 333 K | 343 K | 363 K | 370 K |         |            |
| (PMeTEOIC) <sub>2</sub> | −370                 | −400  | −390  | −400  | −400  | −400  | −390    | 12         |
| (PEtTEOIC) <sub>2</sub> | −440                 | −420  | −430  | −450  | −420  | −440  | −430    | 10         |

<sup>1</sup> Value of  $E_{elec}$  averaged over six temperatures. <sup>2</sup> Standard deviation of  $E_{elec}$  at six temperatures.
